# Supplementary material for: Key Determinants of Nutritional Status Among Children Under Five in Uganda: Insights from the 2016 Demographic and Health Survey
Source: Research Square preprint supplement (doi:10.21203/rs.3.rs-5819667/v1), 2025-01-15
Supplement: Supplementary file 1 [file 55ff421b937b5d728773de52.docx]

**Additional file 1**

**Table 1: Categorization of variables**

| **Variables** | **Categorization** |
| --- | --- |
| ***Child's characteristics*** |  |
| Stunting status | 1. Stunting 2. Not stunting |
| Wasting status | 1. Wasting 2. Not wasting |
| Underweight status | 1. Underweight 2. Not underweight |
| Child's age in months | 1. Between 0-12 2. Between 13-24 3. Between 25-36 4. Between 37-48 5. Between 49-59 |
| Sex of child | 1. Male 2. Female |
| ***Mother's characteristics*** |  |
| Highest educational level | 1. No education 2. Primary 3. Secondary 4. University |
| Religion of mother | 1. No religion 2. Anglican 3. Catholic 4. Muslim 5. Born-again Christians |
| Literacy level | 1. Cannot read 2. Able to read 3. Blind |
| Pregnancy status | 1. Not pregnant 2. Pregnant |
| Type of earnings from women's work | 1. Not paid 2. Cash only 3. Cash and in-kind 4. In-kind only |
| Current marital status | 1. Never in union 2. Married 3. Living with partner 4. Widowed 5. Divorced 6. Separated |
| Mother’s working status | 1. Not working 2. Working |
| Women's age in years | 1. Between 15-24 2. Between 25-34 3. Between 35-49 |
| Native language of mothers | 1. Others 2. English 3. Luganda 4. Luo 5. Lugbara 6. Ateso 7. Ngakarimojong 8. Runyankole-Rukiga 9. Runyoro-Rutoro 10. Lusoga |
| ***Media accessed by mothers*** |  |
| Frequency of listening to radio | 1. Not at all 2. Less than once a week 3. At least once a week |
| Frequency of watching television | 1. Not at all 2. Less than once a week 3. At least once a week |
| Frequency of reading newspapers | 1. Not at all 2. Less than once a week 3. At least once a week |
| ***Child feeding status by mothers*** |  |
| Gave child tinned, powdered or fresh milk | 1. No 2. Yes |
| Gave child fortified baby food (Cerelac, etc.) | 1. No 2. Yes |
| Gave child eggs | 1. No 2. Yes |
| Gave child mangoes, papayas, other vitamin fruits) | 1. No 2. Yes |
| Gave child meat (beef, pork, lamb, chicken, etc.) | 1. No 2. Yes |
| Gave child potatoes, cassava, or other tubers | 1. No 2. Yes |
| Gave child any dark green leafy vegetables | 1. No 2. Yes |
| Gave child fish or shellfish | 1. No 2. Yes |
| Gave child food made from beans, peas, lentils, nuts | 1. No 2. Yes |
| ***Household characteristics*** |  |
| Sex of household head | 1. Male 2. Female |
| Age of household head (Years) | 1. Between 16-24 2. Between 25-34 3. Between 35-44 4. Between 45-54 5. Above 55 |
| Number of household members | 1. Between 1-5 2. Between 6-10 3. Above 10 |
| Number of children 5 and below in household | 1. Between 0-2 2. Between 3-4 3. Above 4 |
| Region | 1. Kampala 2. South Buganda 3. North Buganda 4. Busoga 5. Bukedi 6. Bugisu 7. Teso 8. Karamoja 9. Lango 10. Acholi 11. West nile 12. Bunyoro 13. Tooro 14. Ankole 15. Kigezi |
| Type of place of residence | 1. Urban 2. Rural |
| Source of drinking water | 1. Unsafe 2. Safe |
| Type of toilet facility | 1. Not improved 2. Improved |
| Household has radio | 1. No 2. Yes |
| Household has television | 1. No 2. Yes |
| Household has refrigerator | 1. No 2. Yes |
| Type of cooking fuel | 1. Tradition 2. Modern |
| Household wealth status | 1. Poor 2. Middle 3. Rich |
